# Supplementary material for: Quantifying sources, transport, deposition, and radiative forcing of black carbon over the Himalayas and Tibetan Plateau
Source: Copernicus journal article supplement (doi:10.5194/acp-15-6205-2015), 2015-06-08
Supplement: Supplementary file 1 [file acp-15-6205-2015-supplement.pdf]

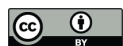

*Supplement of*

## **Quantifying sources, transport, deposition, and radiative forcing of black carbon over the Himalayas and Tibetan Plateau**

**R. Zhang et al.**

*Correspondence to:* H. Wang ([hailong.wang@pnnl.gov](mailto:hailong.wang@pnnl.gov))

The copyright of individual parts of the supplement might differ from the CC-BY 3.0 licence.

**Table S1.** The percentage contribution to global annual mean BC emissions from biomass-BB, biofuel-BB and FF sectors in each of the tagged source regions.

| <b>Source region</b> | <b>Biomass-BB (%)</b> | <b>Biofuel-BB (%)</b> | <b>FF (%)</b> |
|----------------------|-----------------------|-----------------------|---------------|
| <b>ARC</b>           | 0.07                  | 0.00                  | 0.04          |
| <b>NAM</b>           | 0.72                  | 1.04                  | 4.36          |
| <b>CAM</b>           | 1.37                  | 0.55                  | 1.25          |
| <b>SAM</b>           | 4.82                  | 0.90                  | 2.88          |
| <b>EUR</b>           | 0.19                  | 1.11                  | 6.35          |
| <b>NAF</b>           | 0.01                  | 0.32                  | 1.14          |
| <b>SAF</b>           | 15.75                 | 4.47                  | 0.89          |
| <b>MDE</b>           | 0.00                  | 0.03                  | 1.18          |
| <b>CAS</b>           | 0.22                  | 0.02                  | 0.43          |
| <b>SAS</b>           | 0.65                  | 5.56                  | 2.58          |
| <b>EAS</b>           | 0.64                  | 5.70                  | 15.30         |
| <b>SEA</b>           | 5.22                  | 2.49                  | 2.40          |
| <b>PAN</b>           | 1.81                  | 0.06                  | 0.47          |
| <b>RBU</b>           | 2.11                  | 0.23                  | 2.66          |
| <b>HTP</b>           | 0.00                  | 0.08                  | 0.09          |
| <b>ROW</b>           | 0.03                  | 0.00                  | 1.78          |

Table S2. Global annual and seasonal mean lifetime (day) of BC emitted from the 32 tagged source regions/sectors, as well as from BB and FF sector over the whole globe (all source regions combined).

|              |    | <b>DJF</b> | <b>MAM</b> | <b>JJA</b> | <b>SON</b> | <b>ANN</b> |
|--------------|----|------------|------------|------------|------------|------------|
| <b>ARC</b>   | BB | 2.2        | 3.0        | 4.7        | 3.9        | 4.5        |
|              | FF | 2.1        | 1.9        | 1.6        | 1.4        | 1.7        |
| <b>NAM</b>   | BB | 2.2        | 3.0        | 4.1        | 3.6        | 3.4        |
|              | FF | 2.1        | 2.8        | 3.9        | 3.2        | 3.0        |
| <b>CAM</b>   | BB | 2.6        | 4.9        | 2.8        | 1.7        | 3.9        |
|              | FF | 3.5        | 5.0        | 2.4        | 2.3        | 3.3        |
| <b>SAM</b>   | BB | 3.5        | 3.7        | 8.4        | 6.8        | 6.8        |
|              | FF | 2.9        | 3.0        | 4.1        | 3.9        | 3.5        |
| <b>EUR</b>   | BB | 2.0        | 2.7        | 6.4        | 4.0        | 4.0        |
|              | FF | 1.9        | 2.5        | 4.9        | 2.9        | 3.1        |
| <b>NAF</b>   | BB | 8.8        | 10.8       | 10.2       | 10.0       | 10.0       |
|              | FF | 5.4        | 8.9        | 12.9       | 9.1        | 9.1        |
| <b>SAF</b>   | BB | 9.3        | 6.1        | 5.1        | 7.1        | 7.2        |
|              | FF | 4.4        | 4.1        | 4.3        | 3.9        | 4.2        |
| <b>MDE</b>   | BB | 5.9        | 8.9        | 12.6       | 11.3       | 9.9        |
|              | FF | 6.2        | 9.1        | 12.4       | 11.5       | 9.8        |
| <b>CAS</b>   | BB | 2.8        | 4.7        | 7.5        | 4.7        | 5.9        |
|              | FF | 2.7        | 5.4        | 9.7        | 5.8        | 5.9        |
| <b>SAS</b>   | BB | 7.4        | 7.5        | 1.9        | 4.4        | 5.5        |
|              | FF | 7.5        | 7.6        | 2.3        | 4.9        | 5.6        |
| <b>EAS</b>   | BB | 3.2        | 3.6        | 2.5        | 3.1        | 3.1        |
|              | FF | 3.1        | 3.3        | 2.4        | 3.0        | 2.9        |
| <b>SEA</b>   | BB | 2.7        | 3.5        | 1.8        | 1.8        | 2.5        |
|              | FF | 2.2        | 1.8        | 1.4        | 1.5        | 1.7        |
| <b>PAN</b>   | BB | 5.7        | 4.5        | 5.6        | 6.8        | 6.1        |
|              | FF | 4.2        | 3.3        | 2.5        | 2.9        | 3.2        |
| <b>RBU</b>   | BB | 2.2        | 3.8        | 4.4        | 3.4        | 4.0        |
|              | FF | 2.0        | 2.5        | 4.9        | 2.6        | 3.0        |
| <b>HTP</b>   | BB | 6.6        | 6.0        | 4.0        | 6.5        | 5.8        |
|              | FF | 6.1        | 6.2        | 4.9        | 6.4        | 5.9        |
| <b>ROW</b>   | BB | 2.2        | 2.6        | 4.1        | 2.7        | 2.9        |
|              | FF | 2.3        | 2.5        | 2.4        | 2.5        | 2.5        |
| <b>Globe</b> | BB | 6.9        | 5.0        | 4.6        | 5.2        | 5.4        |
|              | FF | 3.1        | 3.6        | 3.8        | 3.5        | 3.5        |

**Table S3.** Concentration and deposition of BC and dust in snow/ice from an ice core drilled at Mt. Everest (27.7°N, 86.9°E) reported by Ginot et al. (2014) and evaluated by Ménégoz et al. (2014), where the monsoon season is defined as June-September and the inter-monsoon consists of the rest of eight months. The model grid cell is located northward (28.0°N, 86.9°E), where the altitude of the model surface is high enough to allow a continuous seasonal snow cover. Modeled concentrations represent the temporal average of the BC/dust concentrations in the top snow layer (i.e., a constant surface depth of 8 mm snow water in Ménégoz et al. (2014) and the top 2 cm of snowpack in this study). “N/A” means no snow in the model grid where the ice core located. All percentages are computed from the annual deposition values.

|                                                          |             | Annual | Inter-monsoon | Monsoon | References            |
|----------------------------------------------------------|-------------|--------|---------------|---------|-----------------------|
| BC concentration<br>(ng g <sup>-1</sup> )                | Observation | 3.0    | 9.2           | 1.0     | Ménégoz et al. (2014) |
|                                                          | Model       | 201    | 285           | 28      | Ménégoz et al. (2014) |
|                                                          | Model       | 111.8  | 111.8         | N/A     | This study            |
| BC deposition<br>(mg m <sup>-2</sup> yr <sup>-1</sup> )  | Observation | 3.2    | 75%           | 25%     | Ménégoz et al. (2014) |
|                                                          | Model       | 53     | 58%           | 42%     | Ménégoz et al. (2014) |
|                                                          | Model       | 34.3   | 63%           | 37%     | This study            |
| Dust concentration<br>(mg kg <sup>-1</sup> )             | Observation | 10.1   | 11.1          | 10.1    | Ménégoz et al. (2014) |
|                                                          | Model       | 10.4   | 13            | 5       | Ménégoz et al. (2014) |
|                                                          | Model       | 4.4    | 4.4           | N/A     | This study            |
| Dust deposition<br>(g m <sup>-2</sup> yr <sup>-1</sup> ) | Observation | 10.1   | 28%           | 72%     | Ménégoz et al. (2014) |
|                                                          | Model       | 6.4    | 60%           | 40%     | Ménégoz et al. (2014) |
|                                                          | Model       | 3.8    | 59%           | 41%     | This study            |



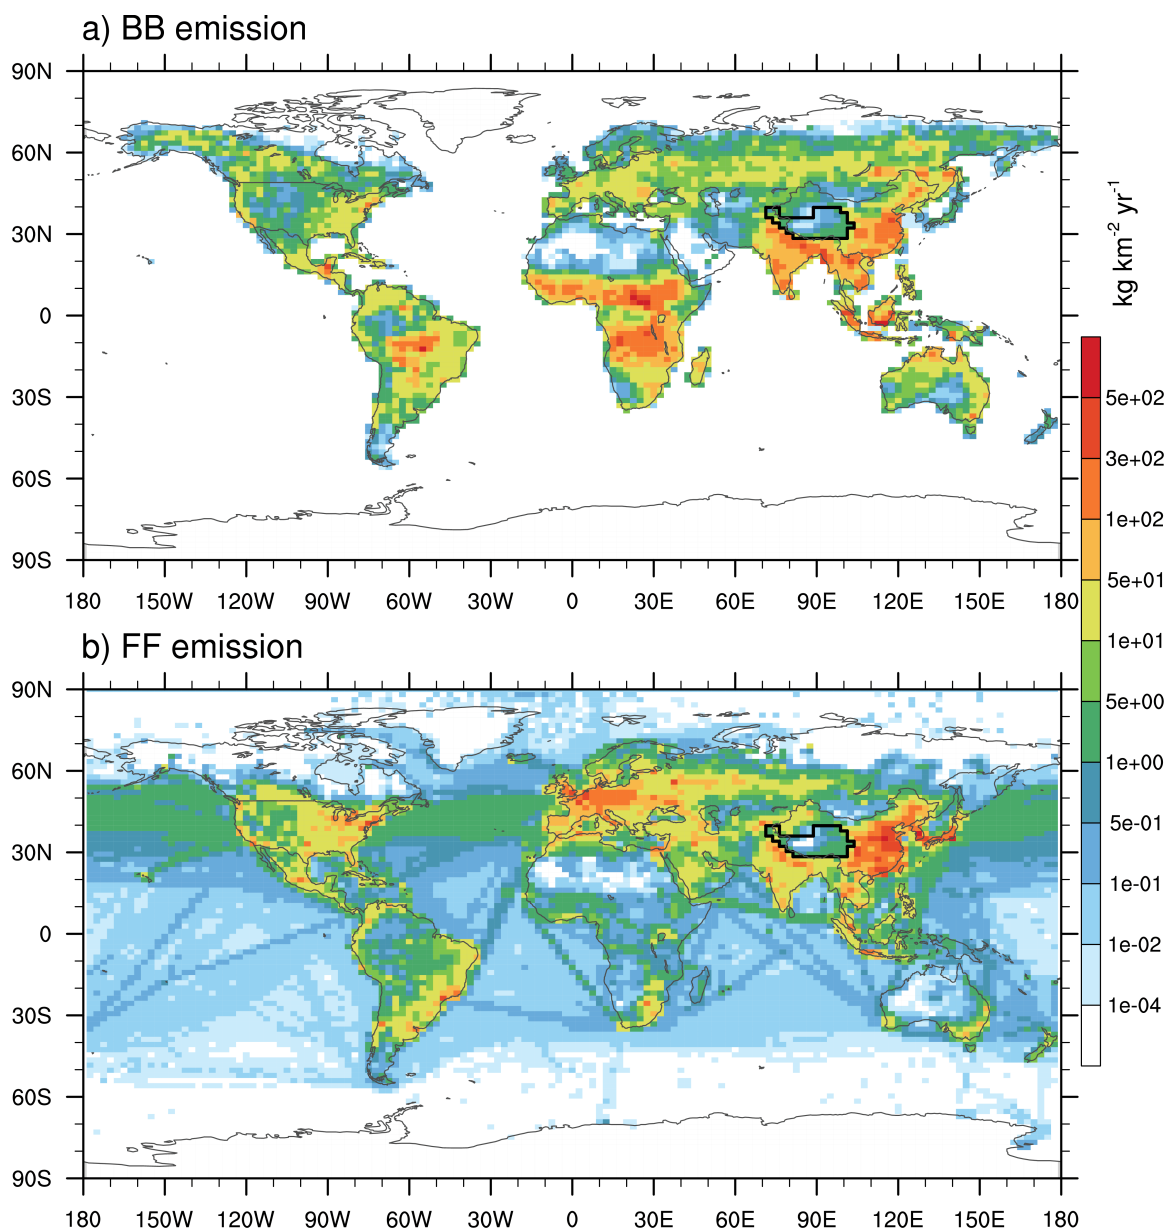

**Fig. S1.** Spatial distribution of BC annual mean emission rate from (a) BB and (b) FF sectors in the IPCC AR5 year-2000 emission inventory. HTP is marked with black outline.

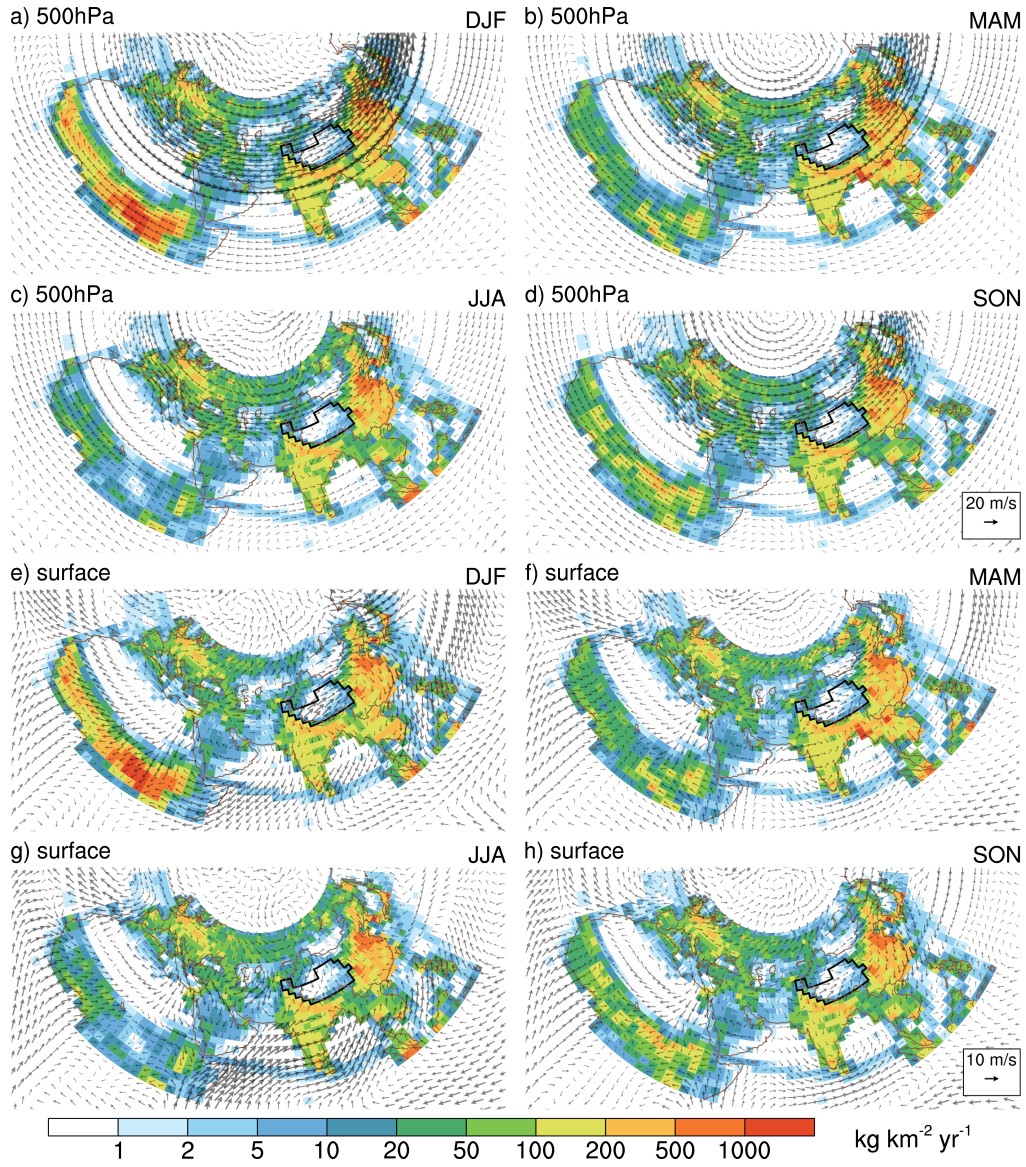

**Fig. S2.** Seasonal mean BC emission rates (in  $\text{kg km}^{-2} \text{yr}^{-1}$ , colors) in the AR5 year-2000 emission inventory, superimposed with horizontal wind vectors (denoted by arrows) at 500hPa (a–d) and at the surface (e–h, lowest layer of the model) from year-2001 MERRA reanalysis datasets used in the CAM5 simulation. The HTP is marked with black outline.

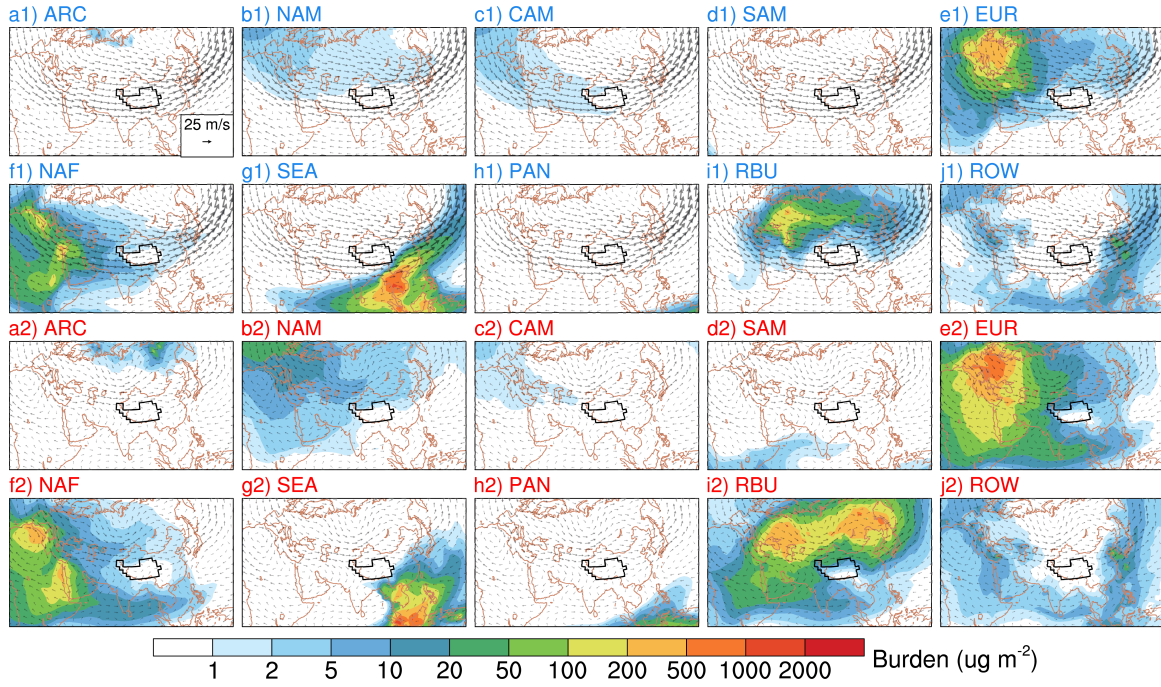

**Fig. S3.** Spatial distributions of seasonal mean BC (BB+FF) column burden (in  $\mu\text{g m}^{-2}$ , colors) for DJF (a1–j1) and JJA (a2–j2), respectively, originating from the ten tagged source regions (in addition to the six major ones shown in Fig. 4), superimposed with the corresponding seasonal mean horizontal wind vectors at 500hPa. The HTP is marked with black outline.



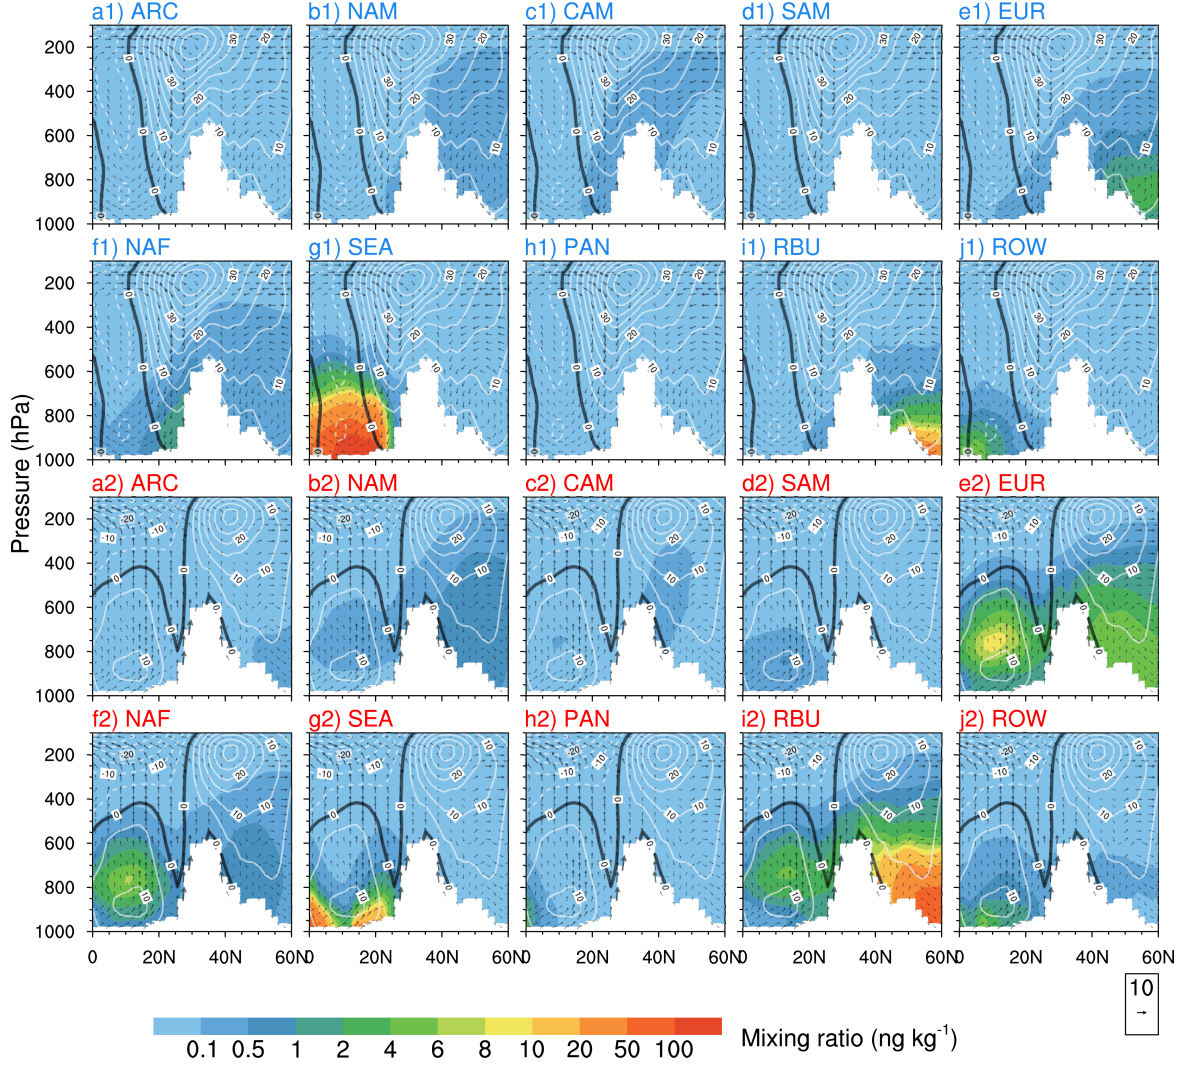

**Fig. S4.** Latitude-height distributions of seasonal mean BC (BB+FF) mass mixing ratios (in  $\text{ng kg}^{-1}$ , colors) averaged over the longitude band of  $71.25\text{--}101.25^\circ \text{E}$  for DJF (a1–j1) and JJA (a2–j2), respectively, originating from the ten tagged source regions (in addition to the six major ones shown in Fig. 4). The white shaded area denotes topography, and the superimposed white contours at intervals of  $5 \text{ m s}^{-1}$  represent the westerly (solid) and easterly (dashed) corresponding seasonal mean zonal winds over the same longitude band with the thick solid black contour at  $0 \text{ m s}^{-1}$ . The corresponding seasonal mean wind vectors (consisting of vertical velocity in units of  $10^{-4} \text{ hPa s}^{-1}$  and meridional wind in  $\text{m s}^{-1}$ ) are represented by arrows.

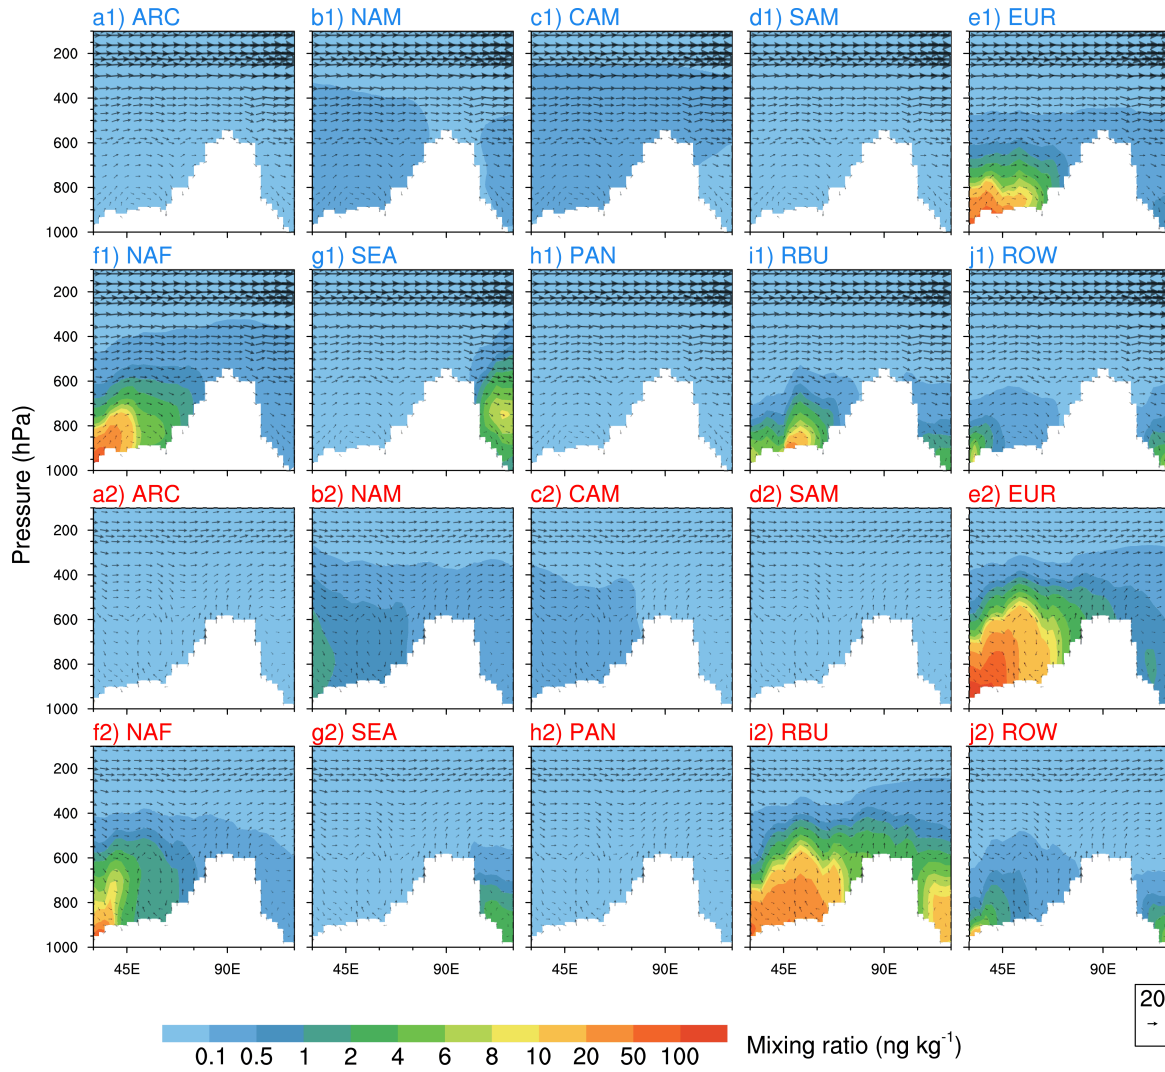

**Fig. S5.** Longitude-height distributions of seasonal mean BC (BB+FF) mass mixing ratios (in  $\text{ng kg}^{-1}$ , colors) averaged over the latitude band of  $28\text{--}40^\circ \text{N}$  for DJF (a1–j1) and JJA (a2–j2), respectively, originating from the ten tagged source regions (in addition to the six major ones shown in Fig. 4). The white shaded area denotes topography, and the superimposed arrows represent corresponding seasonal mean wind vectors (consisting of vertical velocity in units of  $10^{-4} \text{ hPa s}^{-1}$  and zonal wind in  $\text{m s}^{-1}$ ).

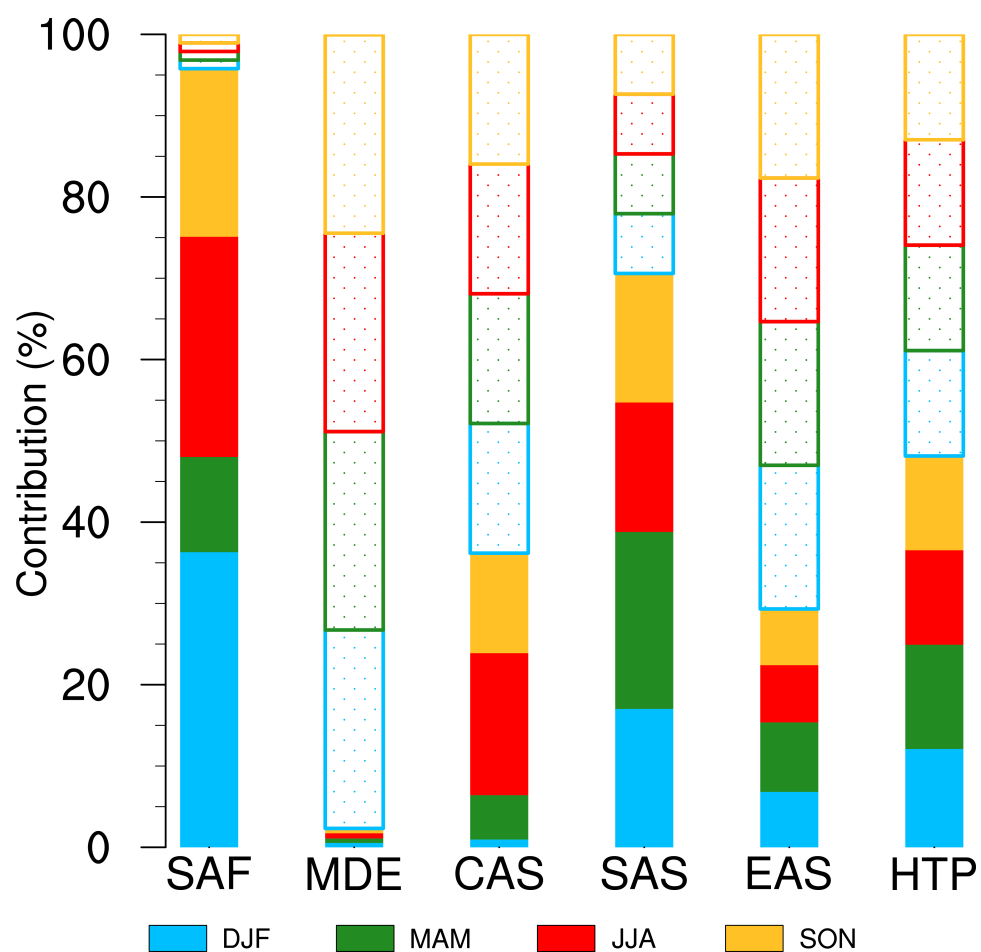

**Fig. S6.** Seasonal contribution to the annual total BC emissions from BB (solid pattern bar) and FF (dotted pattern bar) source sectors in each of the six source regions.
